# Supplementary material for: Predicting survival and prognosis of postoperative breast cancer brain metastasis: a population-based retrospective analysis
Source: PubMed Central journal article supplement — Chin Med J (Engl). 2023 May 31;136(14):1699–707. doi: 10.1097/CM9.0000000000002674 (PMC10344505; doi:10.1097/cm9.0000000000002674), 2023-05-31
Supplement: cm9-136-1699-s001.pdf [file cm9-136-1699-s001.pdf]

**Supplementary Table 1: Clinicopathological characteristics of BCBM patients.**

| Characteristics       | SEER<br>Cohort<br>(n=173) | Training<br>Cohort<br>(n=161) | Validation<br>cohort<br>(n=149) | Total*<br>(n=310) | $t/\chi^2$                                               | P-value                                     |
|-----------------------|---------------------------|-------------------------------|---------------------------------|-------------------|----------------------------------------------------------|---------------------------------------------|
|                       |                           |                               |                                 |                   | (training<br>vs.<br>validation<br>cohorts ) <sup>†</sup> | (training<br>vs.<br>validation<br>cohorts ) |
| Age                   |                           |                               |                                 |                   | 0.347                                                    | 0.841                                       |
| <35 years             | 6 (3.5)                   | 24 (14.9)                     | 19 (12.8)                       | 43 (13.9)         |                                                          |                                             |
| 35–56 years           | 70 (40.5)                 | 106 (65.8)                    | 102 (68.5)                      | 208 (67.1)        |                                                          |                                             |
| >56 years             | 97 (56.1)                 | 31 (19.3)                     | 28 (18.8)                       | 59 (19.0)         |                                                          |                                             |
| Tumor location        |                           |                               |                                 |                   | 0.017                                                    | 0.895                                       |
| Left                  | 86 (49.7)                 | 68 (42.2)                     | 65 (43.6)                       | 133 (42.9)        |                                                          |                                             |
| Right                 | 87 (50.3)                 | 93 (57.8)                     | 84 (56.4)                       | 177 (57.1)        |                                                          |                                             |
| Tumor size            |                           |                               |                                 |                   | 5.802                                                    | 0.122                                       |
| T1                    | 30 (17.3)                 | 24 (14.9)                     | 36 (24.2)                       | 60 (19.4)         |                                                          |                                             |
| T2                    | 51 (29.5)                 | 86 (53.4)                     | 73 (49.0)                       | 159 (51.3)        |                                                          |                                             |
| T3                    | 29 (16.8)                 | 32 (19.9)                     | 20 (13.4)                       | 52 (16.8)         |                                                          |                                             |
| T4                    | 63 (36.4)                 | 19 (11.8)                     | 20 (13.4)                       | 39 (12.6)         |                                                          |                                             |
| Lymph node metastasis |                           |                               |                                 |                   | 1.168                                                    | 0.761                                       |
| N0                    | 37 (21.4)                 | 26 (16.1)                     | 25 (16.8)                       | 51 (16.5)         |                                                          |                                             |
| N1                    | 72 (41.6)                 | 50 (31.1)                     | 52 (34.9)                       | 102 (32.9)        |                                                          |                                             |
| N2                    | 22 (12.7)                 | 39 (24.2)                     | 29 (19.5)                       | 68 (21.9)         |                                                          |                                             |
| N3                    | 42 (24.3)                 | 46 (28.6)                     | 43 (28.9)                       | 89 (28.7)         |                                                          |                                             |
| Surgery method        |                           |                               |                                 |                   | 0.057                                                    | 0.972                                       |
| Improved radical cure | –                         | 131 (81.4)                    | 121 (81.2)                      | 252 (81.3)        |                                                          |                                             |
| Breast conservation   | –                         | 13 (8.1)                      | 13 (8.7)                        | 26 (8.4)          |                                                          |                                             |
| Unilateral mastectomy | –                         | 17 (10.6)                     | 15 (10.1)                       | 32 (10.3)         |                                                          |                                             |
| Molecular subtype     |                           |                               |                                 |                   | 0.737                                                    | 0.864                                       |
| Luminal A             | 77 (44.5)                 | 44 (27.3)                     | 37 (24.8)                       | 81 (26.1)         |                                                          |                                             |
| Luminal B             | 29 (16.8)                 | 38 (23.6)                     | 32 (21.5)                       | 70 (22.6)         |                                                          |                                             |
| Triple negative       | 47 (27.2)                 | 27 (16.8)                     | 29 (19.5)                       | 56 (18.1)         |                                                          |                                             |
| HER2 enriched         | 20 (11.6)                 | 52 (32.3)                     | 51 (34.2)                       | 103 (33.2)        |                                                          |                                             |
| ER                    |                           |                               |                                 |                   | 0.028                                                    | 0.868                                       |
| Negative              | 71 (41.0)                 | 89 (55.3)                     | 80 (53.7)                       | 169 (54.5)        |                                                          |                                             |
| Positive              | 102 (59.0)                | 72 (44.7)                     | 69 (46.3)                       | 141 (45.5)        |                                                          |                                             |
| PR                    |                           |                               |                                 |                   | 0.015                                                    | 0.902                                       |
| Negative              | 94 (54.3)                 | 108 (67.1)                    | 98 (65.8)                       | 206 (66.5)        |                                                          |                                             |
| Positive              | 79 (45.7)                 | 53 (32.9)                     | 51 (34.2)                       | 104 (33.5)        |                                                          |                                             |
| HER2                  |                           |                               |                                 |                   | 0.061                                                    | 0.804                                       |
| Negative              | 124 (71.7)                | 108 (67.1)                    | 97 (65.1)                       | 205 (66.1)        |                                                          |                                             |
| Positive              | 49 (28.3)                 | 53 (32.9)                     | 52 (34.9)                       | 105 (33.9)        |                                                          |                                             |
| Ki67                  |                           |                               |                                 |                   | 0.042                                                    | 0.979                                       |
| <14%                  | –                         | 14 (8.7)                      | 12 (8.1)                        | 26 (8.4)          |                                                          |                                             |
| 14–30%                | –                         | 15 (9.3)                      | 14 (9.4)                        | 29 (9.4)          |                                                          |                                             |

|                   |            |            |            |            |        |       |
|-------------------|------------|------------|------------|------------|--------|-------|
| >30%              | –          | 132 (82.0) | 123 (82.6) | 255 (82.3) |        |       |
| Chemotherapy      |            |            |            |            | 3.174  | 0.075 |
| No                | 52 (30.1)  | 50 (31.1)  | 32 (21.5)  | 82 (26.5)  |        |       |
| Yes               | 121 (69.9) | 111 (68.9) | 117 (78.5) | 228 (73.5) |        |       |
| Targeted therapy  |            |            |            |            | 0.385  | 0.535 |
| No                | –          | 133 (82.6) | 118 (79.2) | 251 (81.0) |        |       |
| Yes               | –          | 28 (17.4)  | 31 (20.8)  | 59 (19.0)  |        |       |
| Endocrine therapy |            |            |            |            | 0.003  | 0.960 |
| No                | –          | 99 (61.5)  | 93 (62.4)  | 192 (61.9) |        |       |
| Yes               | –          | 62 (38.5)  | 56 (37.6)  | 118 (38.1) |        |       |
| Radiation therapy |            |            |            |            | 0.016  | 0.899 |
| No                | 44 (25.4)  | 54 (33.5)  | 48 (32.2)  | 102 (32.9) |        |       |
| Yes               | 129 (74.6) | 107 (66.5) | 101 (67.8) | 208 (67.1) |        |       |
| Liver metastasis  |            |            |            |            | 0.207  | 0.649 |
| No                | 144 (83.2) | 83 (51.6)  | 72 (48.3)  | 155 (50.0) |        |       |
| Yes               | 29 (16.8)  | 78 (48.4)  | 77 (51.7)  | 155 (50.0) |        |       |
| Lung metastasis   |            |            |            |            | <0.001 | 1.000 |
| No                | 110 (63.6) | 63 (39.1)  | 58 (38.9)  | 121 (39.0) |        |       |
| Yes               | 63 (36.4)  | 98 (60.9)  | 91 (61.1)  | 189 (61.0) |        |       |
| Bone metastasis   |            |            |            |            | 0.360  | 0.549 |
| No                | 87 (50.3)  | 80 (49.7)  | 68 (45.6)  | 148 (47.7) |        |       |
| Yes               | 86 (49.7)  | 81 (50.3)  | 81 (54.4)  | 162 (52.3) |        |       |
| Vascular invasion |            |            |            |            | 1.262  | 0.261 |
| No                | –          | 96 (59.6)  | 99 (66.4)  | 195 (62.9) |        |       |
| Yes               | –          | 65 (40.4)  | 50 (33.6)  | 115 (37.1) |        |       |
| Nerve invasion    |            |            |            |            | 0.762  | 0.383 |
| No                | –          | 153 (95.0) | 137 (91.9) | 290 (93.5) |        |       |
| Yes               | –          | 8 (5.0)    | 12 (8.1)   | 20 (6.5)   |        |       |
| Vital status      |            |            |            |            | <0.001 | 1.000 |
| Dead              | 131 (75.7) | 116 (72.0) | 107 (71.8) | 223 (71.9) |        |       |
| Alive             | 42 (24.3)  | 45 (28.0)  | 42 (28.2)  | 87 (28.1)  |        |       |
| Survival (months) | 23.0±20.9  | 39.0±26.3  | 36.9±22.8  | 38.0±24.7  | –0.730 | 0.466 |

\*The total of validation and verification cohorts. Data are expressed as *n* (%) or mean±standard deviation. †In addition to survival (which was tested by *t* test), all factors were tested by chi-squared test. BCBM: Breast cancer brain metastasis; ER: Estrogen receptor; HER2: Human epidermal growth factor receptor-2; PR: Progesterone receptor; SEER: Surveillance, Epidemiology, and End Results Program.

### Supplementary Table 2: Univariate Cox regression analysis on patients with brain metastasis of breast cancer.

| Characteristics | Hazard ratio | <i>P</i> -value | Characteristics | Hazard ratio | <i>P</i> -value |
|-----------------|--------------|-----------------|-----------------|--------------|-----------------|
|-----------------|--------------|-----------------|-----------------|--------------|-----------------|

|                                                    | (95% CI)         |       |                       | (95% CI)         |        |
|----------------------------------------------------|------------------|-------|-----------------------|------------------|--------|
| Age                                                |                  |       | Ki67                  |                  |        |
| <35                                                | Reference        |       | <14%                  | Reference        |        |
| 35–56                                              | 0.72 (0.44–1.18) | 0.190 | 14–30%                | 1.30 (0.50–3.33) | 0.591  |
| >56                                                | 0.79 (0.43–1.45) | 0.448 | >30%                  | 2.09 (1.00–4.38) | 0.050  |
| Primary site                                       |                  |       | Chemotherapy          |                  |        |
| Left                                               | Reference        |       | No                    | Reference        |        |
| Right                                              | 0.62 (0.43–0.89) | 0.011 | Yes                   | 0.49 (0.33–0.72) | <0.001 |
| ER                                                 |                  |       | Targeted therapy      |                  |        |
| Negative                                           | Reference        |       | No                    | Reference        |        |
| Positive                                           | 0.78 (0.54–1.14) | 0.201 | Yes                   | 1.35 (0.83–2.20) | 0.221  |
| PR                                                 |                  |       | Endocrine therapy     |                  |        |
| Negative                                           | Reference        |       | No                    | Reference        |        |
| Positive                                           | 1.17 (0.81–1.71) | 0.402 | Yes                   | 0.72 (0.49–1.06) | 0.094  |
| HER2                                               |                  |       | Radiotherapy          |                  |        |
| Negative                                           | Reference        |       | No                    | Reference        |        |
| Positive                                           | 1.67 (1.13–2.47) | 0.010 | Yes                   | 0.68 (0.46–0.99) | 0.045  |
| Tumor size                                         |                  |       | Lymph node metastasis |                  |        |
| T1                                                 | Reference        |       | N0                    | Reference        |        |
| T2                                                 | 0.75 (0.50–1.12) | 0.162 | N1                    | 0.50 (0.27–0.90) | 0.021  |
| T3                                                 | 0.81 (0.45–1.45) | 0.478 | N2                    | 0.86 (0.48–1.53) | 0.608  |
| T4                                                 | 0.75 (0.50–1.12) | 0.162 | N3                    | 1.71 (1.01–2.91) | 0.047  |
| Surgery method                                     |                  |       | Liver metastasis      |                  |        |
| Modified radical mastectomy                        | Reference        |       | No                    | Reference        |        |
| Protective and radical operation of mastocarcinoma | 0.30 (0.12–0.75) | 0.010 | Yes                   | 1.29 (0.89–1.86) | 0.179  |
| Single incision for breast cancer                  | 1.52 (0.88–2.63) | 0.134 | Lung metastasis       |                  |        |
| Molecular subtype                                  |                  |       | No                    | Reference        |        |
| Luminal A                                          | Reference        |       | Yes                   | 0.56 (0.39–0.81) | 0.002  |
| Luminal B                                          | 1.75 (1.05–2.91) | 0.031 | Bone metastasis       |                  |        |
| Triple negative                                    | 1.33 (0.71–2.51) | 0.373 | No                    | Reference        |        |
| HER2 enriched                                      | 2.16 (1.32–3.51) | 0.002 | Yes                   | 1.18 (0.81–1.71) | 0.381  |
| Nerve invasion                                     |                  |       | Vascular invasion     |                  |        |
| No                                                 | Reference        |       | No                    | Reference        |        |
| Yes                                                | 2.41 (1.17–4.97) | 0.017 | Yes                   | 1.56 (1.07–2.28) | 0.021  |

CI: Confidence interval; ER: Estrogen receptor; HER2: Human epidermal growth factor receptor-2; PR: Progesterone receptor.

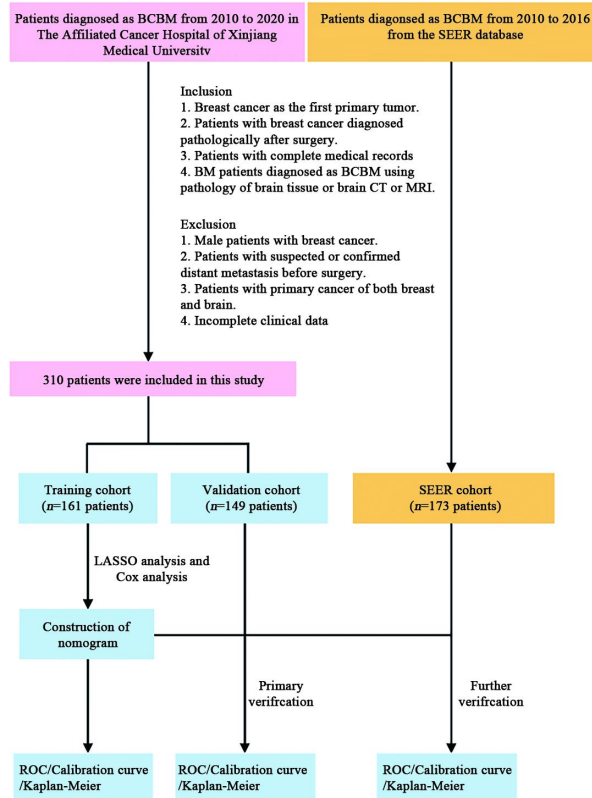

**Supplementary Figure 1:** Data collection and analysis processes of this study. BCBM: Breast cancer brain metastasis; LASSO: Least absolute shrinkage and selection operator; ROC: Receiver operating characteristic; SEER: Surveillance, Epidemiology, and End Results Program.
